# Supplementary material
Source: PubMed Central journal article supplement (PMC2908717)
Supplement: NIHMS215128-supplement-01.pdf [file NIHMS215128-supplement-01.pdf]

**Supplemental Table 1. Summary odd ratios (OR) estimates and 95% confidence intervals (CI) derived from study-specific results on single nucleotide polymorphism in *HSD17B1* and breast cancer risk overall**

| SNP                                          | No. of Studies | Random-effects summaries |         | Fixed-effects summaries |         | p-value for between-study heterogeneity |
|----------------------------------------------|----------------|--------------------------|---------|-------------------------|---------|-----------------------------------------|
|                                              |                | OR (95% CI)              | p-value | OR (95% CI)             | p-value |                                         |
| <b>rs676387 (IVS4-150 C&gt;A)</b>            |                |                          |         |                         |         |                                         |
| CC                                           | 7              | 1.00                     |         | 1.00                    |         |                                         |
| CA                                           |                | 1.04 (0.97, 1.12)        | 1.05    | 1.06 (1.00, 1.12)       | 0.07    | 0.20                                    |
| AA                                           |                | 1.12 (0.99, 1.27)        | 0.08    | 1.14 (1.02, 1.27)       | 0.02    | 0.30                                    |
| <b>rs605059<sup>5</sup> (Ex6+220 G&gt;A)</b> |                |                          |         |                         |         |                                         |
| AA                                           | 10             | 1.00                     |         | 1.00                    |         |                                         |
| AG                                           |                | 0.93 (0.87, 0.99)        | 0.03    | 0.93 (0.87, 0.99)       | 0.02    | 0.39                                    |
| GG                                           |                | 0.95 (0.85, 1.07)        | 0.41    | 0.93 (0.86, 1.01)       | 0.07    | 0.06                                    |

**Supplemental Table 2. Summary odd ratios (OR) estimates and 95% confidence intervals (CI) derived from study-specific results on single nucleotide polymorphism in *HSD17B1* and risk of breast tumors expressing the estrogen receptor (ER-positive) and those not expressing the estrogen receptor (ER-negative)**

| SNP                                          | ER-positive tumors vs. controls |                          |         |                         |         |                                         | ER-negative tumors vs. controls |                          |         |                         |         |                                         |
|----------------------------------------------|---------------------------------|--------------------------|---------|-------------------------|---------|-----------------------------------------|---------------------------------|--------------------------|---------|-------------------------|---------|-----------------------------------------|
|                                              | No. of Studies                  | Random-effects summaries |         | Fixed-effects summaries |         | p-value for between-study heterogeneity | No. of Studies                  | Random-effects summaries |         | Fixed-effects summaries |         | p-value for between-study heterogeneity |
|                                              |                                 | OR (95% CI)              | p-value | OR (95% CI)             | p-value |                                         |                                 | OR (95% CI)              | p-value | OR (95% CI)             | p-value |                                         |
| <b>rs676387 (IVS4-150 C&gt;A)</b>            |                                 |                          |         |                         |         |                                         |                                 |                          |         |                         |         |                                         |
| CC                                           | 6                               | 1.00                     |         | 1.00                    |         |                                         | 6                               | 1.00                     |         | 1.00                    |         |                                         |
| CA                                           |                                 | 1.07 (0.97, 1.18)        | 0.16    | 1.09 (1.01, 1.18)       | 0.03    | 0.23                                    |                                 | 0.87 (0.65, 1.17)        | 0.35    | 0.93 (0.82, 1.06)       | 0.28    | 0.001                                   |
| AA                                           |                                 | 1.05 (0.91, 1.22)        | 0.51    | 1.05 (0.91, 1.22)       | 0.51    | 0.95                                    |                                 | 1.02 (0.70, 1.50)        | 0.91    | 1.19 (0.94, 1.51)       | 0.16    | 0.11                                    |
| <b>rs605059<sup>5</sup> (Ex6+220 G&gt;A)</b> |                                 |                          |         |                         |         |                                         |                                 |                          |         |                         |         |                                         |
| AA                                           | 6                               | 1.00                     |         | 1.00                    |         |                                         | 6                               | 1.00                     |         | 1.00                    |         |                                         |
| AG                                           |                                 | 0.94 (0.87, 1.03)        | 0.17    | 0.94 (0.87, 1.03)       | 0.17    | 0.48                                    |                                 | 1.02 (0.86, 1.21)        | 0.83    | 1.00 (0.86, 1.15)       | 0.96    | 0.30                                    |
| GG                                           |                                 | 0.97 (0.84, 1.11)        | 0.65    | 0.95 (0.87, 1.05)       | 0.31    | 0.16                                    |                                 | 1.18 (0.78, 1.80)        | 0.44    | 1.07 (0.90, 1.27)       | 0.45    | 0.001                                   |

**Supplemental Table 3. Age- and center-adjusted odds ratios (OR) and 95% confidence intervals (CI) for the association between HSD17β1 haplotype-tagging SNPs and breast cancer stratified by age**

| SNP Name                          | Geno-<br>type | Among women younger than age 45 |            |                   | Among women age 45 - 55 |             |                   | Among women older than age 55 |             |                   | p for<br>inter<br>action |
|-----------------------------------|---------------|---------------------------------|------------|-------------------|-------------------------|-------------|-------------------|-------------------------------|-------------|-------------------|--------------------------|
|                                   |               | Cases                           | Controls   | OR (95% CI)       | Cases                   | Controls    | OR (95% CI)       | Cases                         | Controls    | OR (95% CI)       |                          |
|                                   |               | N (%)                           | N (%)      |                   | N (%)                   | N (%)       |                   | N (%)                         | N (%)       |                   |                          |
| <b>Polish Breast Cancer Study</b> |               |                                 |            |                   |                         |             |                   |                               |             |                   |                          |
| rs676387<br>(IVS4-150 C>A)        | CC            | 170 (58.8)                      | 171 (59.4) | 1.00              | 533 (60.3)              | 571 (60.9)  | 1.00              | 602 (57.4)                    | 700 (61.2)  | 1.00              | 0.58                     |
|                                   | CA            | 96 (33.2)                       | 98 (34.0)  | 0.99 (0.69, 1.41) | 296 (33.5)              | 323 (34.4)  | 0.99 (0.81, 1.20) | 388 (37.0)                    | 384 (33.6)  | 1.18 (0.99, 1.41) |                          |
|                                   | AA            | 23 (8.0)                        | 19 (6.6)   | 1.26 (0.66, 2.42) | 55 (6.2)                | 44 (4.7)    | 1.34 (0.89, 2.03) | 58 (5.5)                      | 60 (5.2)    | 1.12 (0.77, 1.64) |                          |
|                                   | per allele    |                                 |            | 1.06 (0.82, 1.38) |                         |             | 1.06 (0.91, 1.24) |                               |             | 1.12 (0.97, 1.29) |                          |
| rs605059<br>(Ex6+220 G>A)         | AA            | 85 (30.0)                       | 83 (29.0)  | 1.00              | 239 (27.4)              | 259 (28.2)  | 1.00              | 298 (29.2)                    | 299 (26.8)  | 1.00              | 0.91                     |
|                                   | AG            | 141 (49.8)                      | 138 (48.3) | 1.04 (0.70, 1.52) | 423 (48.5)              | 451 (49.0)  | 1.02 (0.81, 1.27) | 482 (47.2)                    | 566 (50.7)  | 0.85 (0.70, 1.05) |                          |
|                                   | GG            | 57 (20.1)                       | 65 (22.7)  | 0.88 (0.55, 1.41) | 211 (24.2)              | 210 (22.8)  | 1.09 (0.84, 1.41) | 242 (23.7)                    | 252 (22.6)  | 0.96 (0.76, 1.22) |                          |
|                                   | per allele    |                                 |            | 0.95 (0.75, 1.19) |                         |             | 1.04 (0.91, 1.19) |                               |             | 0.97 (0.86, 1.10) |                          |
| <b>SEARCH</b>                     |               |                                 |            |                   |                         |             |                   |                               |             |                   |                          |
| rs676387<br>(IVS4-150 C>A)        | CC            | 440 (52.0)                      | 28 (50.9)  | 1.00              | 1080 (51.2)             | 585 (54.0)  | 1.00              | 705 (50.2)                    | 1784 (52.7) | 1.00              | 0.39                     |
|                                   | CA            | 334 (39.5)                      | 19 (34.6)  | 1.10 (0.58, 2.07) | 854 (40.5)              | 423 (39.0)  | 1.07 (0.92, 1.26) | 577 (41.1)                    | 1335 (39.5) | 1.14 (0.99, 1.32) |                          |
|                                   | AA            | 72 (8.5)                        | 8 (14.6)   | 0.50 (0.20, 1.25) | 177 (8.4)               | 77 (7.1)    | 1.21 (0.90, 1.62) | 123 (8.8)                     | 264 (7.8)   | 1.17 (0.91, 1.49) |                          |
|                                   | per allele    |                                 |            | 0.81 (0.53, 1.26) |                         |             | 1.09 (0.96, 1.23) |                               |             | 1.11 (1.00, 1.23) |                          |
| rs605059<br>(Ex6+220 G>A)         | AA            | 281(33.7)                       | 21 (38.2)  | 1.00              | 675 (32.3)              | 313 (29.0)  | 1.00              | 488 (35.1)                    | 1072 (32.4) | 1.00              | 0.15                     |
|                                   | AG            | 407 (48.8)                      | 25 (45.5)  | 1.51 (0.80, 2.89) | 1003 (47.9)             | 563 (52.2)  | 0.79 (0.67, 0.95) | 664 (47.7)                    | 1573 (47.5) | 0.95 (0.82, 1.10) |                          |
|                                   | GG            | 146 (17.5)                      | 9 (16.4)   | 1.63 (0.69, 3.86) | 414 (19.8)              | 202 (18.7)  | 0.95 (0.76, 1.18) | 240 (17.2)                    | 665 (20.1)  | 0.76 (0.63, 0.92) |                          |
|                                   | per allele    |                                 |            | 1.32 (0.86, 2.03) |                         |             | 0.95 (0.85, 1.06) |                               |             | 0.88 (0.80, 0.97) |                          |
| <b>Pooled Analysis</b>            |               |                                 |            |                   |                         |             |                   |                               |             |                   |                          |
| rs676387<br>(IVS4-150 C>A)        | CC            | 610 (53.7)                      | 199 (58.0) | 1.00              | 1613 (53.9)             | 1156 (57.1) | 1.00              | 1307 (53.3)                   | 2484 (54.9) | 1.00              | 0.27                     |
|                                   | CA            | 430 (37.9)                      | 117 (34.1) | 1.02 (0.75, 1.38) | 1150 (38.4)             | 746 (36.9)  | 1.03 (0.91, 1.17) | 965 (39.3)                    | 1719 (38.0) | 1.13 (1.01, 1.26) |                          |
|                                   | AA            | 95 (8.4)                        | 27 (7.9)   | 0.91 (0.54, 1.56) | 232 (7.8)               | 121 (6.0)   | 1.25 (0.99, 1.59) | 181 (7.4)                     | 324 (7.2)   | 1.15 (0.94, 1.41) |                          |
|                                   | per allele    |                                 |            | 0.98 (0.79, 1.23) |                         |             | 1.08 (0.98, 1.18) |                               |             | 1.10 (1.01, 1.19) |                          |
| rs605059<br>(Ex6+220 G>A)         | AA            | 366 (32.8)                      | 104 (30.5) | 1.00              | 914 (30.8)              | 572 (28.6)  | 1.00              | 786 (32.6)                    | 1371 (31.0) | 1.00              | 0.59                     |
|                                   | AG            | 548 (49.1)                      | 163 (47.8) | 1.04 (0.75, 1.44) | 1426 (48.1)             | 1014 (50.8) | 0.89 (0.77, 1.01) | 1146 (47.5)                   | 2139 (48.3) | 0.91 (0.81, 1.02) |                          |
|                                   | GG            | 203 (18.2)                      | 74 (21.7)  | 0.93 (0.62, 1.39) | 625 (21.1)              | 412 (20.6)  | 1.01 (0.85, 1.19) | 482 (20.0)                    | 917 (20.2)  | 0.87 (0.75, 1.01) |                          |
|                                   | per allele    |                                 |            | 0.97 (0.80, 1.19) |                         |             | 0.99 (0.91, 1.08) |                               |             | 0.93 (0.87, 1.00) |                          |
